# Supplementary material
Source: PubMed Central journal article supplement (PMC4507214)
Supplement: pnas.1507782112.sapp.pdf [file pnas.1507782112.sapp.pdf]

**SI Figure 1. Quality assurance data per district.** Average DDT concentrations recovered from wall surfaces following IRS in 2014. Figure generated using the Disease Data Management System QA module using post-IRS HPLC testing of DDT concentration on wall surfaces.

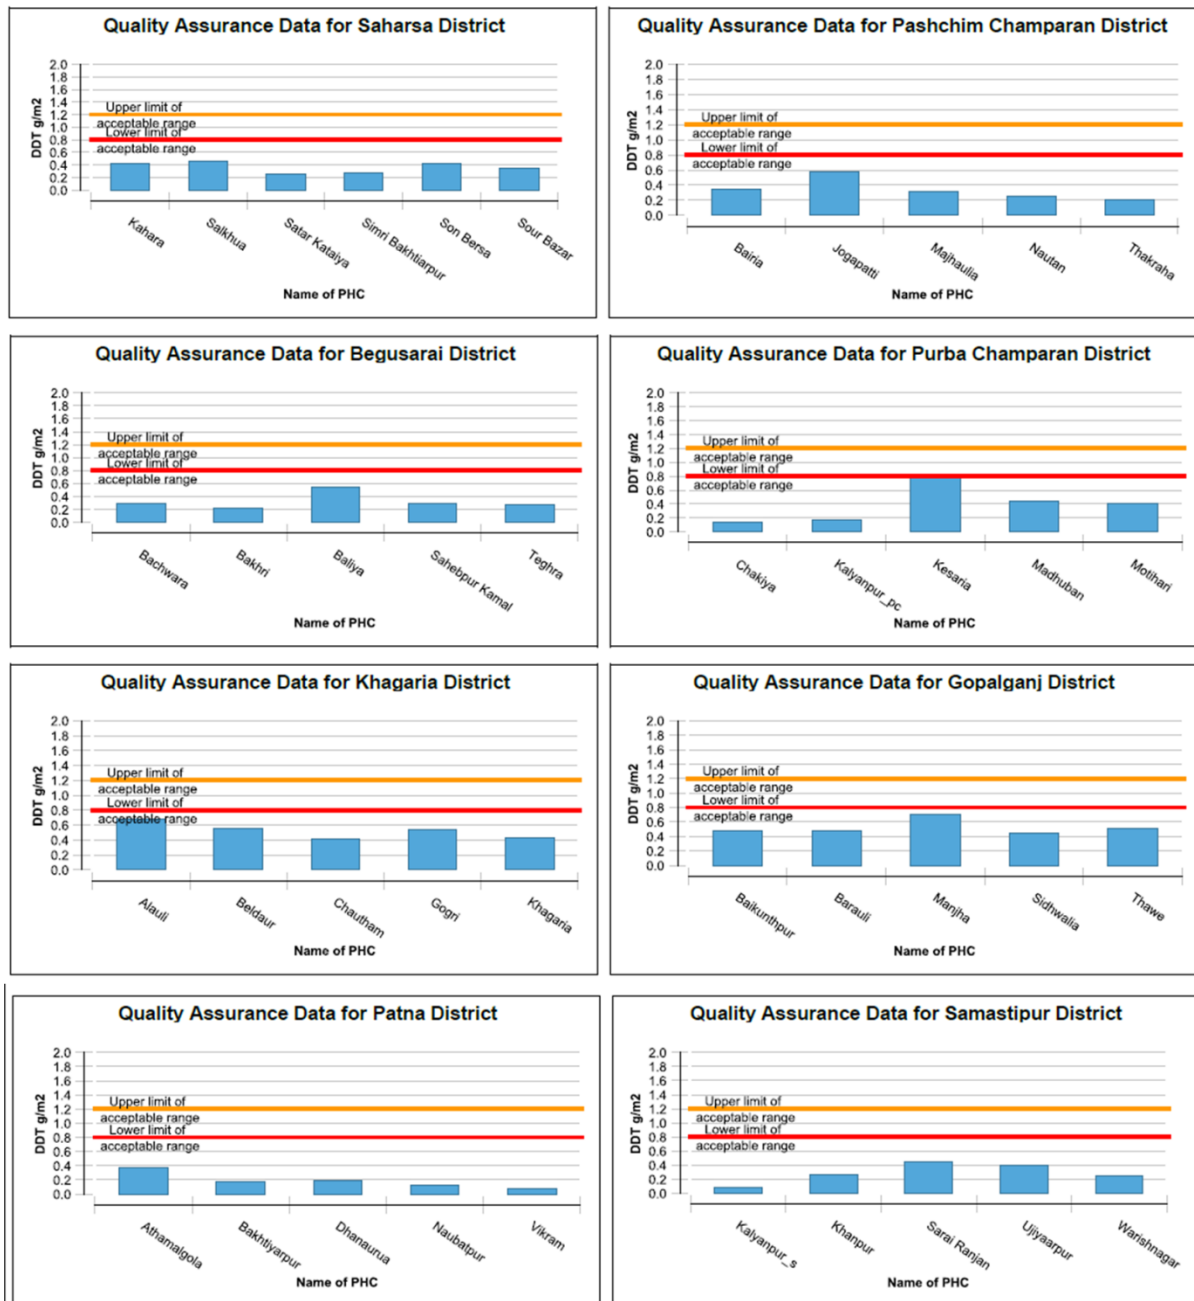

### Published Literature Used to Generate Figure 3

1. Das Gupta, RK., Saxena, NB., Joshi, RD., Rao, JS. 1995. DDT resistance in *P. Papatasi* in Bihar. J Commun Dis; 27(2): 124.
2. Dhiman, RC., Raghavendra, K., Kumar, V., Kesari, S., Kishore, K. 2003. Susceptibility status of *Phlebotomus argentipes* to insecticides in districts Vaishali and Patna (Bihar). J Commun Dis.; 35(1): 49-51.
3. Dinesh, DS., Das, ML., Picado, A., Roy, L., Rijal, S., Singh, SP., Das, P., Boelaert, M., and Coosemans, M. 2010. Insecticide susceptibility of *Phlebotomus argentipes* in VL endemic districts in India and Nepal. PLOS NTDs; 4 (10) : e860.
4. Kaul, Das, Raj, Saxena, Narasimham. 1993. Entomological monitoring of kala-azar control in Bihar state, India: observations in Vaishali and Patna districts. J Com dis; 25 (3): 101-106.
5. Joshi, Kaul, Wattal. 1979. Susceptibility of Sandflies to Organochlorine Insecticides in Bihar India - Further reports. J Com Dis; 11 (4): 209-213.
6. Kaul, Wattal, Bhatnagar, Mathur. 1978. Preliminary Observations on the susceptibility status of *Phlebotomus argentipes* and *Phlebotomus papatasi* to DDT in two districts of north Bihar. J Com Dis; 10 (4): 208-211.
7. Kishore, K., Kumar, V., Kesari, S., Bhattacharya, SK, Das, P. 2004. Susceptibility of *Phlebotomus argentipes* against DDT in endemic Districts of North Bihar, India. J Commun Dis; 36 (1):41-4.
8. Kumar, K., Singh, K., Das, RK., Rahman, SJ., Sharma, SK. Laboratory and field observations on the effectiveness of DDT for the control of the vector sandfly, *Phlebotomus argentipes* in the kala-azar endemic state of Bihar. World Health Organization. Division of Control of Tropical Diseases. WHO/LEISH/95.36.
9. Mukhopadhyay, AK., Saxena, NB., Narasimham, MV. 1990. Susceptibility status of *Phlebotomus argentipes* to DDT in some kala-azar endemic areas of Bihar (India). Indian J Med Res.; 91: 458-60.
10. Mukhopadhyay, AK., Saxena, NB., Narasimham, MV. 1992. Susceptibility status of *Phlebotomus argentipes* to DDT in some kala-azar endemic districts of Bihar India. WHO/CTD/VBC/92.995
11. Singh, Das, Sharma. 2001. Resistance of sandflies to DDT in Kala-azar endemic districts of Bihar, India. Bulletin of WHO; 79: (8).
12. Singh, M., Dhiman, J. 2012. Insecticide susceptibility status of *Phlebotomus argentipes*, a vector of VL in different foci in 3 states of India. J Vector Borne Dis; 49: December 2012, pp.254-257.
